# Supplementary material for: A platform for high-throughput screening of DNA-encoded catalyst libraries in organic solvents
Source: Royal Society of Chemistry journal article supplement (doi:10.1039/c7sc02779f), 2017-01-01

Supporting Information for:

## A Platform for High-Throughput Screening of DNA-Encoded Catalyst Libraries in Organic Solvents

K. Delaney Hook, John T. Chambers, and Ryan Hili\*

*Department of Chemistry, University of Georgia, Athens, Georgia, 30602*

### Table of Contents

#### Supporting Data

|                                                                                       |     |
|---------------------------------------------------------------------------------------|-----|
| <b>Figure S1.</b> UV-vis spectra of 20,000 MW PEGylated DNA in organic solvents       | S2  |
| <b>Figure S2.</b> qPCR solubility data of 40,000 MW PEGylated DNA in organic solvents | S2  |
| <b>Figure S3.</b> Aldol reaction selection outcome with control                       | S3  |
| <b>Table S1.</b> DNA sequencing results (top 100 selection survivors)                 | S11 |

#### Supporting Methods

|                                    |     |
|------------------------------------|-----|
| General Method                     | S3  |
| Oligonucleotide Synthesis          | S4  |
| DNA Sequences                      | S4  |
| Modified Oligonucleotide Synthesis | S5  |
| Small Molecule Synthesis           | S7  |
| PEG-DNA Solubility                 | S9  |
| Catalyst Selection Procedure       | S10 |
| DNA Sequencing                     | S11 |

|                        |     |
|------------------------|-----|
| <b>Related Spectra</b> | S15 |
|------------------------|-----|

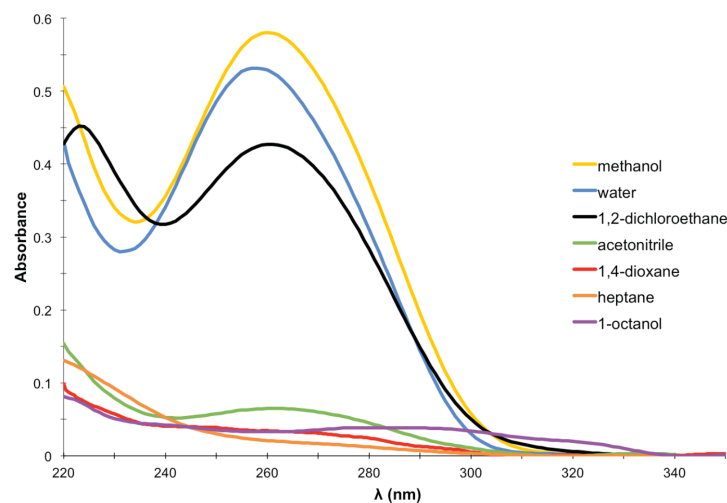

**Figure S1.** PEG-DNA solubility. UV-vis spectra of 20,000 MW PEGylated DNA dissolved in various organic solvents. Dissolved at 5  $\mu\text{M}$  and diluted to 1  $\mu\text{M}$  for experiment.

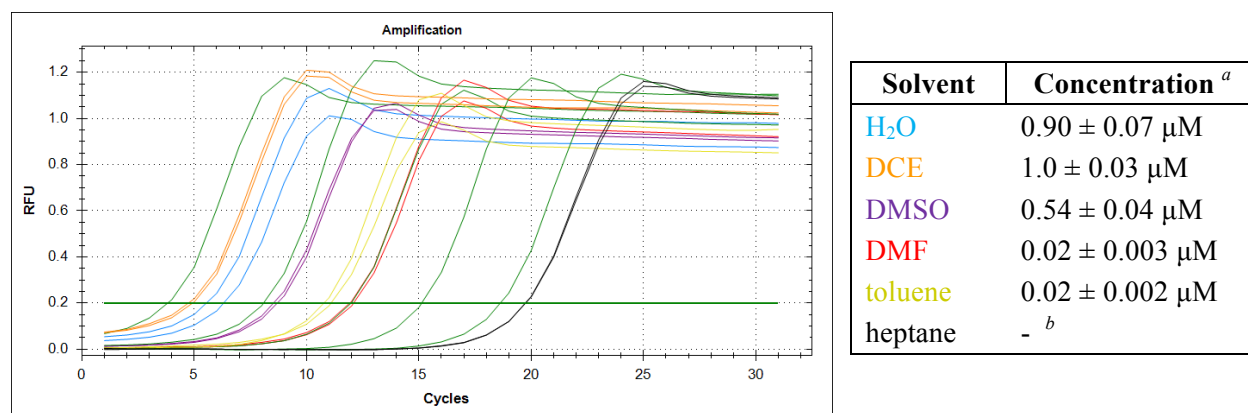

**Figure S2.** qPCR solubility analysis of 40,000 MW PEGylated DNA in various solvents (DMSO, DMF, toluene, 1,2-dichloroethane, water, and heptane). Samples dissolved at 1.0  $\mu\text{M}$  with experiments performed in triplicate. <sup>a</sup> concentration determined by fit to a standardized concentration amplification curve. <sup>b</sup> amplification begins after no template control (NTC) amplification.

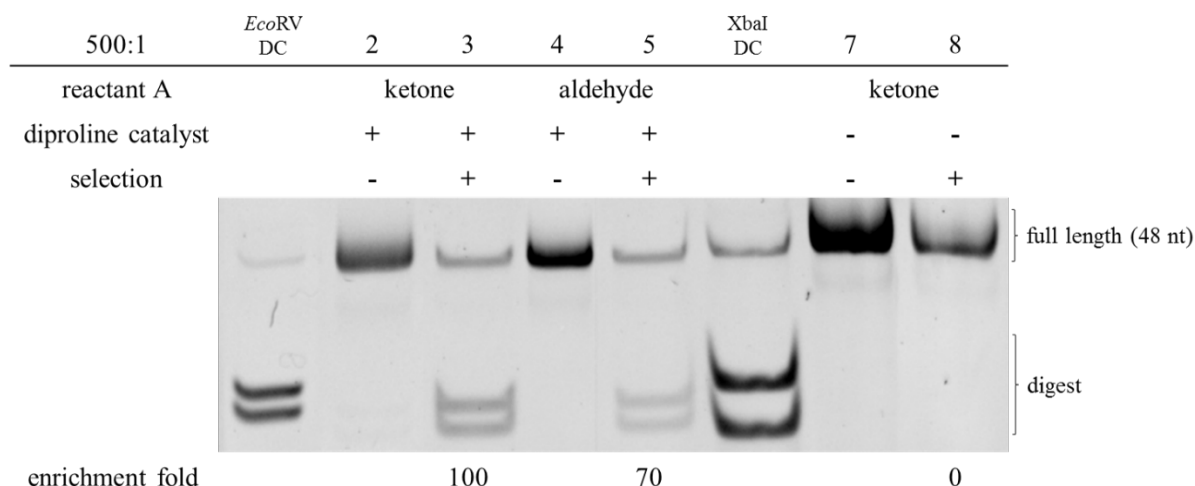

**Figure S3.** Aldol reaction selection outcome. Lanes 1-5: catalyst DNA (Ta\_Eco\_RV encoded). Lane 1: *EcoRV* digest control. Lane 2 Starting library with 3'-ketone (500:1 non-competitive/no-catalyst vs diproline catalyst encoded DNA). Lane 3: Selection outcome with ketone on DNA selection. Lane 4: Starting library with 3'-aldehyde (500:1 non-competitive/no-catalyst vs diproline catalyst encoded DNA). Lane 5. Selection outcome with aldehyde on DNA selection. Lanes 6-8: no catalyst DNA (Ta\_NC encoded). Lane 7: 500:1 starting library with 3'-ketone N12 library vs 3'-ketone Ta\_NC encoded DNA (no catalyst). Lane 8: Negative control (lane 7) selection outcome. DC = restriction enzyme digest control. Negative control experiments performed with different encoding sequence. Samples were run on 15% non-denaturing PAGE.

## General Method

Modified oligonucleotides were synthesized on controlled pore glass (CPG) solid support with a 12-port MerMade automated DNA synthesizer (Bioautomation Corporation). dA/C/G/T phosphoramidites were purchased from Bioautomation Corporation. Modified phosphoramidites were purchased from Glen Research. PEG reagents were purchased from JenKem Technology. Oligonucleotides were purified by RP-HPLC on Hydrosphere C18 column (YMC). All solvents used for solubility measurements were of HPLC grade and purchased from Sigma-Aldrich and dried by activated 3 Å molecular sieves. Organic solvent solubility absorbance spectra were measured on a Thermo-Scientific Evolution 260 Bio UV-Visible Spectrophotometer. Routine concentrations of oligonucleotides analyzed absorbance on NanoDrop

spectrophotometer (Thermo Scientific). All NMR spectra were recorded in CDCl<sub>3</sub> using 400 MHz instrument. RNase-free water was used for all experiments.

**Oligonucleotide Synthesis.** Phosphoramidites were coupled on solid support 3'alkyne-modifier serinol CPG resin (Glen Research). Modified phosphoramidites used include Thiol-modifier C<sub>6</sub> S-S, spacer phosphoramidite 18, and Amino Modifier C6 dT (Glen Research). Normal phosphoramidites purchased from Bioautomation Corporation. dA- + dC- + dG- + dT- CE phosphoramidites mix was used for 'N' amidites (Glen Research). All modifiers were used as recommended by manufacturer.

Syntheses performed on 1 μmol scale on Mermade 12 DNA Synthesizer (Bioautomation Corporation) with final DMT on. Dried support was transferred to Eppendorf tubes and incubated in fresh ammonium hydroxide (400 μL each) at room temperature for 36 hours with rotation for solid support cleavage and nucleobase deprotection. The solution was filtered from resin, concentrated on speed vacuum, and purified by RP-HPLC. DMT deprotection was performed in 80% acetic acid (400 μL) for 1 hr at room temp, frozen, lyophilized, and purified by RP-HPLC. Product fractions were collected, and lyophilized overnight to yield functionalized oligonucleotides.

## DNA Sequences

|                      | (5'→3')                                                                                            |
|----------------------|----------------------------------------------------------------------------------------------------|
| Ta_N12               | /5ThioMC6-DS/CGTACGGTCGACGCTAGC <i>NNNNNNNNNNNN</i><br>CACGTGGAGCTCGGATCC/iAmMC6T//iSp18//3AlkSer/ |
| Ta_EcoRV             | /5ThioMC6-DS/CGTACGGTCGACGCTAGC <i>TGGATATCACTG</i><br>CACGTGGAGCTCGGATCC/iAmMC6T//iSp18//3AlkSer/ |
| Ta_NC                | /5ThioMC6-DS/CGTACGGTCGACGCTAGC <i>ATGTCCAGTTAG</i><br>CACGTGGAGCTCGGATCC/iSp18//3AlkSer/          |
| PFa (forward primer) | CGTACGGTCGACGCTAGC                                                                                 |
| PRa (reverse primer) | GGATCCGAGCTCCACGTG                                                                                 |

## Modified Phosphoramidite Codes

|               |                                      |
|---------------|--------------------------------------|
| /3AlkSer/     | 3' Alkyne Modifier Serinol CPG       |
| /iSp18/       | Int Spacer 18                        |
| /iAmMC6T/     | Int Amino Modifier C6 dT             |
| /5ThioMC6-DS/ | 5' Thiol Modifier C6 S-S (Disulfide) |



## Modified Oligonucleotide Synthesis

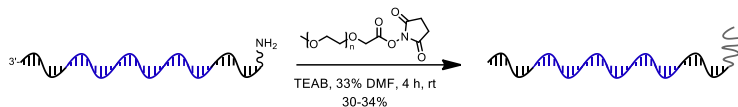

**PEGylation of 5'-amino modified oligonucleotides (solubility experiments).** To a 5'-amino modified oligo (40  $\mu\text{L}$ , 500  $\mu\text{M}$ , 20 nmol) was added TEAB Buffer, pH 8.7 (40  $\mu\text{L}$ , 177 mM) and 10,000, 20,000, 30,000, or 40,000 MW PEG-NHS ester (100 eq.) dissolved in 40  $\mu\text{L}$  of DMF. The reaction was incubated at room temperature overnight, and purified by RP-HPLC [retention time (rt) = 21 min].

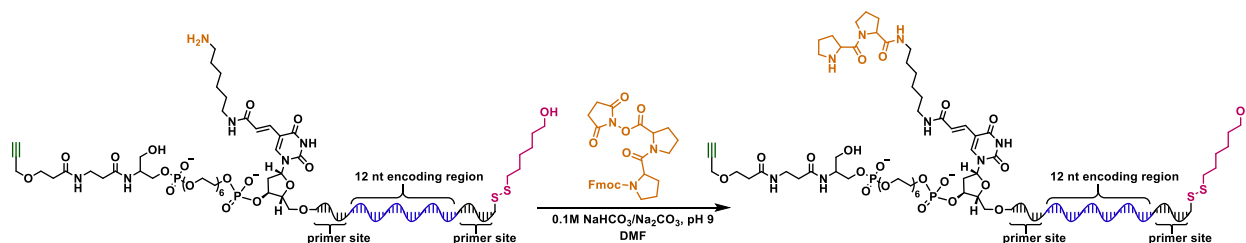

**Proline-proline coupling on amino-modified oligonucleotide.** Fmoc-pro-proline NHS ester (10 mg/ml, ~20 mM in DMF) was prepared fresh and added to amino-modified oligo (20 nmol, 500  $\mu\text{M}$ ) solution in 10 X conjugation buffer ( $\text{NaHCO}_3/\text{Na}_2\text{CO}_3$ , pH 9, 1 M). Mixture was vortexed and incubated at room temperature for 2 hr. Crude mixture was evaporated to dryness, purified by size exclusion column and evaporated to dryness again. Product was Fmoc deprotected in 20 % piperidine/DMF for 10 min at room temperature and evaporated to dryness, deprotection repeated. Product was purified by HPLC on Hydrosphere C18 column to yield the diprolinamide bound oligonucleotide (6.26 nmol, 31.3 % yield, rt = 17.8 min).

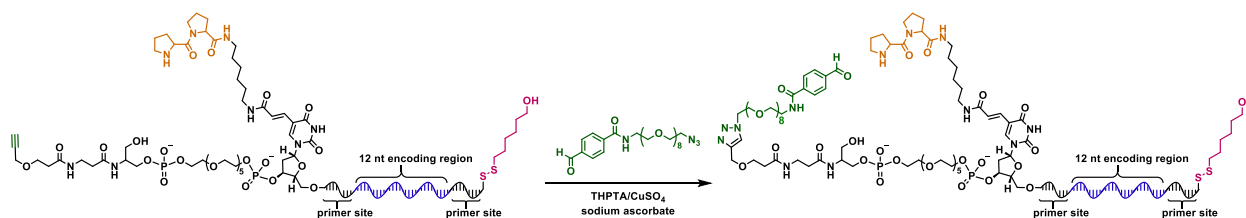

**Azido-ketone (4) or benzaldehyde (3) reactant click conjugation.** Alkyne oligo (25 nmol, 500  $\mu$ M) was combined with 10 mM azido-PEG-ketone (1000 nmol, 40 eq.), THPTA/CuSO<sub>4</sub> (pre-chelated, 100 mM/50 mM, 625 nmol, 25 eq.), and sodium ascorbate (100 mM, 1250 nmol, 50 eq.) and rotated for 1 hr at room temperature. Reaction mixture was filtered through gel column to remove salts and copper sulfate and purified by RP-HPLC on hydrosphere column (rt = 19.9 min) to produce 12.78 nmol (51.1% yield).

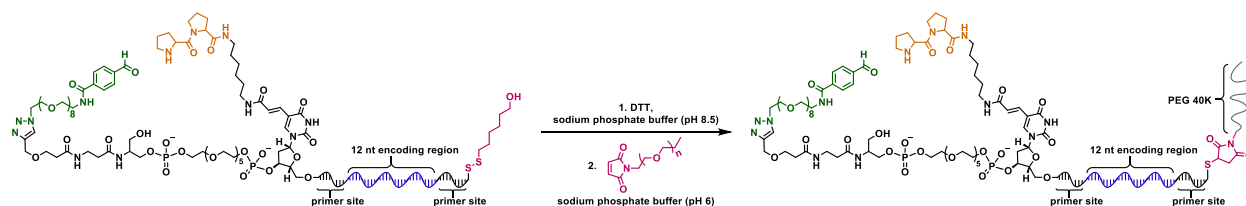

**PEGylation of 5'-disulfide oligonucleotides.** Disulfide oligo (11 nmol) was incubated with 100 mM DTT (125  $\mu$ L) in sodium phosphate buffer (50 mM, pH 8.5) for 1 hr. Residual salts and DTT were removed by Princeton separation column preloaded with phosphate buffer (50 mM, pH 6.0). Activated sulfhydryl oligo was immediately combined with 40K PEG maleimide (130 eq., 20 mM in pH 6 phosphate buffer), vortexed, and incubated at 4  $^{\circ}$ C overnight. Reaction mixture was purified by RP-HPLC on hydrosphere column (rt = 21 min) to produce 3.59 nmol (32.6 % yield).

## Mass Spectrometry of Modified Oligonucleotides

| Oligonucleotide |  | Calculated Mass | LC-ESI-MS        |
|-----------------|--|-----------------|------------------|
| YAm48DS         |  | 16,181.96       | 16,185.6 (+3.64) |
| YPP48DS         |  | 16,377.07       | 16,376.0 (-1.07) |
| KPP48DS         |  | 16,931.69       | 16,914.0 (+0.31) |
| APP48DS         |  | 16,947.71       | 16,948.1 (+0.93) |

Y = alkyne    Am = amino    DS = disulfide    PP = proline-proline    K = ketone    A = aldehyde

## Small Molecule Synthesis

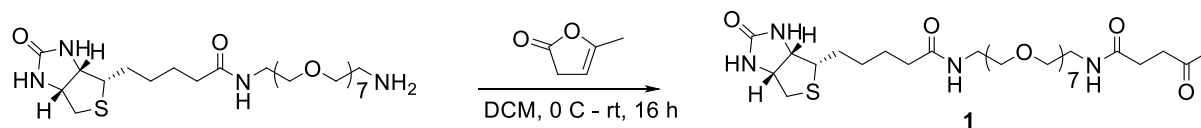

**Biotinylated ketone (1).**  $\alpha$ -Angelica lactone (8.92  $\mu$ L, 0.1 mmol) dissolved in 200  $\mu$ L  $\text{CH}_2\text{Cl}_2$  was cooled to 0  $^\circ\text{C}$ . Upon addition of Biotin-PEG-amine (59.5 mg, 0.1 mmol) the reaction was warmed to room temperature and stirred overnight. Crude reaction mixture was directly loaded onto silica gel column and eluted with 5-10% MeOH in  $\text{CH}_2\text{Cl}_2$ . Product fractions were collected and concentrated *in vacuo* to yield 20.8 mg of biotin-PEG-ketone as a yellow oil (30 % yield).  $^1\text{H}$ -NMR (400 MHz,  $\text{CDCl}_3$ ):  $\delta$  (ppm) 4.61 (m, 1H), 4.42 (m, 1H), 3.56-3.64 (m, 28H), 3.35-3.45 (m, 3H), 3.17-3.20 (m, 2H) 2.91-2.95 (m, 1H), 2.80-2.84 (m, 3H), 2.47 (t, 2H), 2.29-2.32 (m, 2H), 2.18 (s, 3H), 1.6-1.8 (m, 4H), 1.45-1.48 (m, 2H). ESI-MS:  $\text{C}_{31}\text{H}_{56}\text{N}_4\text{O}_{11}\text{SCl}^-$   $[\text{M}-\text{Cl}]^-$  calculated 727.34, found 727.3.

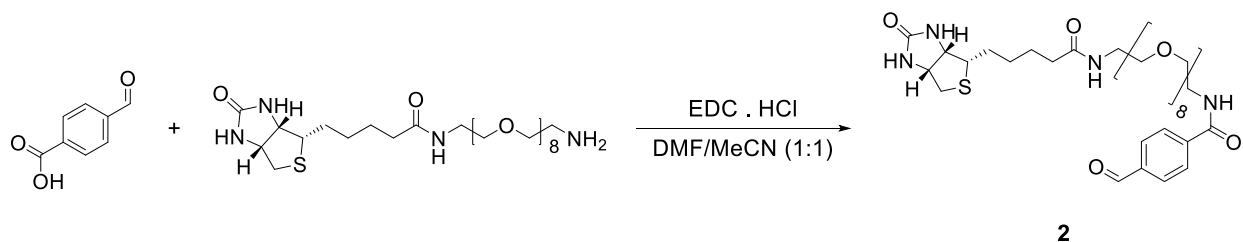

**Biotinylated aldehyde (2).** 4-formyl benzoic acid (26.4 mg, 0.18 mmol, 2.1 eq.) and EDC-HCl (35.5 mg, 0.19 mmol, 2.2 eq.) were weighed into 10 mL round bottom flask and purged with nitrogen gas. To the biotin-PEG-amine (50 mg, 0.08 mmol) was added 500  $\mu$ L of DMF/MeCN (1:1) and stirred until dissolved. The biotin-PEG-amine solution was slowly added to the reaction vial followed by 1.18 mL of DMF/MeCN for a total volume of 1.68 mL. The reaction was stirred at room temperature for 3 hr (reaction completeness monitored by TLC). The solvent was removed *in vacuo*; Crude product was dissolved in DCM and loaded onto silica gel column and eluted with 0-10% MeOH in  $\text{CH}_2\text{Cl}_2$ . Product fractions were collected and concentrated *in vacuo* to yield 20.90 mg (0.0288 mmol, 34% yield) of biotin-PEG-aldehyde as a yellow oil.  $R_f = 0.36$  in 10% MeOH/DCM.  $^1\text{H-NMR}$  (400 MHz,  $\text{CDCl}_3$ ):  $\delta$  (ppm) 10.06 (s, 1H), 7.92-7.99 (m, 4H), 7.15 (br. s, 1H), 3.36-3.67 (m, 36 H). ESI-MS:  $\text{C}_{34}\text{H}_{54}\text{N}_4\text{O}_{11}$   $[\text{M} + \text{Na}]^+$  calculated 749.34, found 749.4.

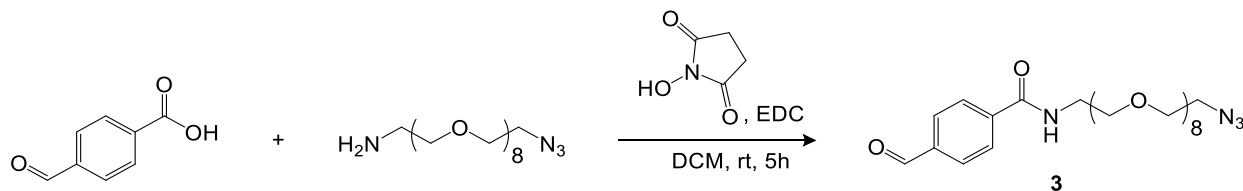

**Azido-PEG-aldehyde (3).** Azido-PEG-amine (110 mg, 0.25 mmol, 0.5M) was added to 4-formyl benzoic acid (75 mg, 0.5 mmol, 2.0 eq.), N-hydroxysuccinimide (57.5 mg, 0.5 mmol, 2.0 eq.), and EDC (100.7 mg, 0.525 mmol, 2.1 eq.) in 0.5 mL DCM. Reaction mixture was stirred at room temperature for 5 hr, diluted with 5 mL of DCM and 5 mL of 1M HCl. Organic layer was separated, dried with magnesium sulfate, and concentrated on rotary evaporator. Mixture was purified by silica gel chromatography (DCM to 10% MeOH in DCM) to yield a yellow oil (25.64 mg, 19% yield).  $^1\text{H-NMR}$  (400 MHz,  $\text{CDCl}_3$ ):  $\delta$  (ppm) 10.06 (s, 1H), 7.92-7.99 (m, 4H), 7.15 (br. s, 1H), 3.36-3.67 (m, 36 H). ESI-MS:  $\text{C}_{26}\text{H}_{42}\text{N}_4\text{O}_{10}$   $[\text{M} + \text{H}]^+$  calculated 571.29, found 573.2.

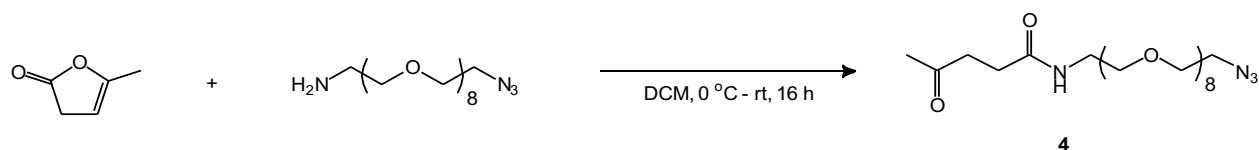

**Azido-PEG-ketone (4).**  $\alpha$ -Angelica lactone (22.5  $\mu$ L, 0.25 mmol) dissolved in 0.5 mL of  $\text{CH}_2\text{Cl}_2$  was cooled to 0  $^\circ\text{C}$ . Azido-PEG-amine (0.25 mmol) was added to the solution and allowed to warm to room temperature. Reaction was stirred under nitrogen overnight. Crude reaction mixture directly loaded into silica gel column and purified using a solvent gradient of 0-10% MeOH in EtOAc to afford the product (60 mg, 44.7% yield).  $^1\text{H-NMR}$  (400 MHz,  $\text{CDCl}_3$ ):  $\delta$  (ppm) 6.26 (br. s, 1H), 3.37-3.68 (m, 36 H), 2.78 (t, 2H), 2.42-2.45 (t, 2H), 2.17 (s, 3H). ESI-MS:  $\text{C}_{23}\text{H}_{44}\text{N}_4\text{O}_{10}$   $[\text{M}+\text{H}]^+$  calculated 537.31, found 537.2.

## PEG-DNA Solubility

**Measurement of PEGylated DNA by UV-Vis spectrophotometry.** 10,000-40,000 MW PEGylated-DNA (500 pmol) was lyophilized in Eppendorf tubes. 100  $\mu\text{L}$  of  $\text{H}_2\text{O}$ , methanol, acetonitrile, 1,4-dioxane, 1,2-dichloroethane, heptane, or 1-octanol was added to dry PEG-DNA and vortexed overnight to ensure complete dissolution. Samples were mildly centrifuged. 5  $\mu\text{L}$  of solution was diluted with 95  $\mu\text{L}$  of solvent [1  $\mu\text{M}$ ] and absorbance was measured at 260 nm.

**Measurement of PEGylated DNA solubility in UV-active solvents by qPCR.** A 10-fold dilution standard curve of aqueous phase oligo was prepared and tested in tandem with duplicate samples of the PEG-oligo in water, DMSO, DMF, 1,2-dichloroethane, toluene, and heptane. The initial sample of DNA contained a 5  $\mu\text{M}$  solution (500 pmol in 100  $\mu\text{L}$  solvent). Once dissolved and gently centrifuged to compact any solid suspension, 5.0  $\mu\text{L}$  was removed, evaporated to in speed vacuum, and dissolved in 10  $\mu\text{L}$  of water [0.1  $\mu\text{M}$ ]. The sample was serially diluted by adding 10  $\mu\text{L}$  sample to 90  $\mu\text{L}$  of water to a concentration of 1 nM. 1.0  $\mu\text{L}$  of this solution was combined with SsoAdvanced polymerase (Bio-Rad). Thermocycling and fluorescence measurements were performed on MiniOpticon Real-Time PCR System (Bio-Rad).

## Catalyst Selection Procedure

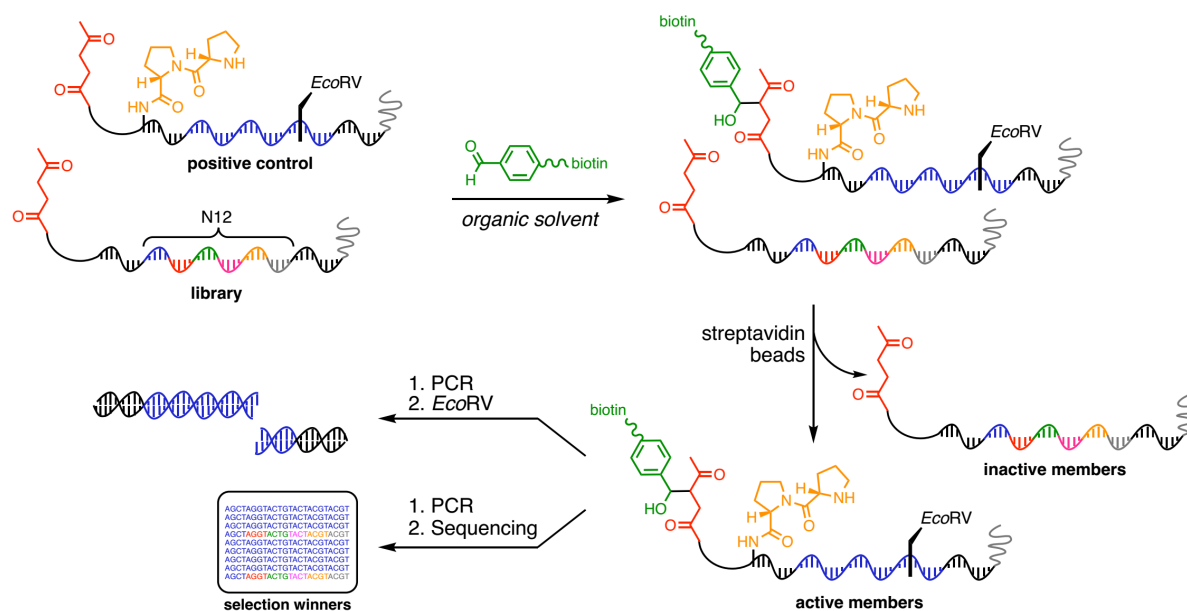

**Aldol Reaction.** Ketone-ProProline-PEG or Aldehyde-ProProline-PEG 48mers were concentrated in speed vacuum from aqueous solutions (20 pmol). Dried oligos were dissolved in 30  $\mu$ L of various reaction solvents and shaken overnight to ensure complete dissolution. Biotinylated-aldehyde (**3**) or biotinylated-ketone (**1**) solutions were prepared in each solvent [5 mM] and 4  $\mu$ L was added to the appropriate reaction vial. Negative control vial contained no biotinylated reactant. Reaction mixtures were vortexed for 90 seconds, spun down, and incubated at 25 ° C for 5 days. Crude reaction samples were evaporated to dryness in speed vacuum, dissolved in 30  $\mu$ L of water, and excess biotinylated reactant was removed by Princeton Centri-Sep gel filtration column. Products were evaporated to dryness, dissolved in streptavidin buffer solution (2.2  $\mu$ L, 1 mg/mL), diluted with water to 5  $\mu$ L, and incubated at room temperature for 30 min. 6x loading dye (1  $\mu$ L) was added, samples were loaded onto 5% TBE non-denaturing gel, run a 150 V for 90 min, stained with EtBr and imaged.

\*Aldol reactions for selection experiments were performed with 100:1, 500:1, and 2,000:1 mixtures of N12-PEG oligos and catalyst-PEG oligos, respectively. Reactions performed as explained above for 3 hours at room temperature.

**Streptavidin bead affinity pull-down.** Hydrophilic streptavidin-coated magnetic beads (2  $\mu$ L, Invitrogen) were prewashed and transferred to an Eppendorf tube, buffer removed with beads magnetized, followed by three washes with 500  $\mu$ L of Wash Buffer (5 mM Tris HCl pH 8, 0.5 mM EDTA, 1M NaCl, 0.05% tween). The buffer was removed and 4  $\mu$ L (twice the volume of initial beads) of 2X Binding Buffer (10 mM Tris HCl pH 8, 1 mM EDTA, 2M NaCl) was added. Oligo sample (10 pmol, 4  $\mu$ L in H<sub>2</sub>O) added to bead solution and incubated for 30 min with rotation at room temperature. Non-biotinylated oligos were removed with eight washes with Wash Buffer (500  $\mu$ L) and two washes with Binding Buffer (500  $\mu$ L). For each wash, the buffer was kept cold and tubes were rotated at room temperature for 5 minutes.

**PCR amplification – on bead.** Selection product bound magnetic streptavidin beads were serially diluted 5000-fold in DI water. 1  $\mu$ L of diluted beads was transferred to self-seal cap PCR tubes and combined with forward and reverse primers, PFa and PRa (20 pmol each, 1.0  $\mu$ M), 2X Hot Start Taq (10  $\mu$ L), and 5  $\mu$ L water. The PCR reactions were performed in a thermocycler with the following program: 1. 3 min, 95°C. 2. 30 sec, 95°C. 3. 30 sec, 58 °C. 4. 1 min, 72°C. Steps 2-4 were repeated for 20 cycles of PCR. Products were immediately put on ice and purified with Qiagen Minelute PCR purification kit following recommended manufacturer's procedure.

**Restriction enzyme digestion.** Purified PCR product DNA (0.1  $\mu$ g) was combined with 10 X Cutsmart Buffer (NEB) (5  $\mu$ L), restriction enzyme EcoRV (1.0  $\mu$ L, 20,000 U/mL) (NEB) and diluted to 50  $\mu$ L with water. Digestion reactions were incubated for 2 hr at 37 ° C.

## **DNA Sequencing**

### **Illumina Primers**

**iTurS\_i7\_D707C** CAA GCA GAA GAC GGC ATA CGA GAT CTG AAG CT GTG ACT GGA GTT  
CAG ACG TGT GCT CTT CCG ATC TGG ATC CGA GCT CCA CGT G

**iTurS\_i7\_D708C** CAA GCA GAA GAC GGC ATA CGA GAT TAA TGC GC GTG ACT GGA GTT  
CAG ACG TGT GCT CTT CCG ATCT GG ATC CGA GCT CCA CGT G

**PRIMEC\_D** AAT GAT ACG GCG ACC ACC GAG ATC T ACA CTC TTT CCC TAC ACG ACG  
CTC TTC CGA TCT CGT ACG GTC GAC GCT AGC

## Post-Sequencing Analysis

**Pre-processing.** Raw Illumina paired-end read .fastq files were merged using the PEAR software<sup>1</sup>. The sequences were trimmed to 48nt by removing the sequencing primer codes using a Python script.

**Post-processing.** All post processing was performed using the FASTAptamer software<sup>2</sup>. The sequences were clustered using a Levenshtein edit distance of 3. Enrichment was determined by comparing normalized reads per million (RPM) values the starting library sequences and the post-selection sequences.

## Sequencing Results

**Table S1.** Top 100 reads of selection readout compared to reads in starting library. Sequence reads normalized to reads per million (RPM).

| Rank | Sequence                                           | Initial<br>(RPM) | Selection<br>(RPM) |
|------|----------------------------------------------------|------------------|--------------------|
| 1    | CGTACGGTCGACGCTAGCTGGATATCACTGCACGTGGAGCTCGGATCC   | 569.58           | 590795.45          |
| 2    | CGTACGGTCGACGCTAGCGAAGTTGGTTTACACGTGGAGCTCGGATCC   | 2.60             | 38.18              |
| 3    | CGTACGGTCGACGCTAGCCTAGCTCATTCTCACGTGGAGCTCGGATCC   | 2.60             | 79.11              |
| 4    | CGTACGGTCGACGCTAGCGCTATATCTTATCACGTGGAGCTCGGATCC   | 2.60             | 81.83              |
| 5    | CGTACGGTCGACGCTAGCTACTTCTGTTTACACGTGGAGCTCGGATCC   | 2.60             | 80.46              |
| 6    | CGTACGGTCGACGCTAGCATCATTTTTTACCACGTGGAGCTCGGATCC   | 2.60             | 105.02             |
| 7    | CGTACGGTCGACGCTAGCTTGACAAGCCTTCACGTGGAGCTCGGATCC   | 2.60             | 45.00              |
| 8    | CGTACGGTCGACGCTAGCGGGCTATCGTGTCACGTGGAGCTCGGATCC   | 2.60             | 60.01              |
| 9    | CGTACGGTCGACGCTAGCTGCTGTGTCCGCCACGTGGAGCTCGGATCC   | 2.60             | 27.29              |
| 10   | CGTACGGTCGACGCTAGCATGACCCCGGCCACGTGGAGCTCGGATCC    | 2.60             | 24.55              |
| 11   | CGTACGGTCGACGCTAGCACAAATTTTCATCTCACGTGGAGCTCGGATCC | 2.60             | 87.29              |
| 12   | CGTACGGTCGACGCTAGCACCCAATAACCACACGTGGAGCTCGGATCC   | 2.60             | 20.46              |
| 13   | CGTACGGTCGACGCTAGCCATTTACCTATCCACGTGGAGCTCGGATCC   | 2.60             | 50.46              |
| 14   | CGTACGGTCGACGCTAGCTTTGAGTATAGCCACGTGGAGCTCGGATCC   | 2.60             | 32.73              |
| 15   | CGTACGGTCGACGCTAGCCTAACTACTCCACACGTGGAGCTCGGATCC   | 2.60             | 36.82              |
| 16   | CGTACGGTCGACGCTAGCTCAATAAAGGGGCACGTGGAGCTCGGATCC   | 2.60             | 34.10              |
| 17   | CGTACGGTCGACGCTAGCTAGTCCGTCATGCACGTGGAGCTCGGATCC   | 2.60             | 46.37              |
| 18   | CGTACGGTCGACGCTAGCCGTTATAGTAAACACGTGGAGCTCGGATCC   | 2.60             | 51.83              |
| 19   | CGTACGGTCGACGCTAGCCCGTCTCCTGGACACGTGGAGCTCGGATCC   | 2.60             | 34.10              |
| 20   | CGTACGGTCGACGCTAGCGCTGCTTTATTCCACGTGGAGCTCGGATCC   | 2.60             | 38.19              |
| 21   | CGTACGGTCGACGCTAGCCTGGTCAACTATCACGTGGAGCTCGGATCC   | 2.60             | 32.73              |
| 22   | CGTACGGTCGACGCTAGCTTCAGTTCTTTCCACGTGGAGCTCGGATCC   | 2.60             | 75.02              |
| 23   | CGTACGGTCGACGCTAGCAAATTATCAATCCACGTGGAGCTCGGATCC   | 2.60             | 72.29              |
| 24   | CGTACGGTCGACGCTAGCATGGGTGATCTTCACGTGGAGCTCGGATCC   | 2.60             | 16.37              |
| 25   | CGTACGGTCGACGCTAGCTGGCATACTTGTCACGTGGAGCTCGGATCC   | 2.60             | 58.65              |
| 26   | CGTACGGTCGACGCTAGCCTGCTTCTGTACACGTGGAGCTCGGATCC    | 2.60             | 47.73              |
| 27   | CGTACGGTCGACGCTAGCTGACAACGATAGCACGTGGAGCTCGGATCC   | 2.60             | 20.46              |



|    |                                                   |       |       |
|----|---------------------------------------------------|-------|-------|
| 28 | CGTACGGTCGACGCTAGCAACTTCACTGTTACGTTGAGCTCGGATCC   | 2.60  | 42.28 |
| 29 | CGTACGGTCGACGCTAGCTCCCTTATCTGGCACGTGGAGCTCGGATCC  | 2.60  | 32.73 |
| 30 | CGTACGGTCGACGCTAGCTTCACTCTCTACCACGTGGAGCTCGGATCC  | 2.60  | 61.37 |
| 31 | CGTACGGTCGACGCTAGCCAAATCCGACACACGTGGAGCTCGGATCC   | 2.60  | 50.46 |
| 32 | CGTACGGTCGACGCTAGCTCGGTGTTGACGCACGTGGAGCTCGGATCC  | 2.60  | 65.47 |
| 33 | CGTACGGTCGACGCTAGCCTGAGATGTCCCCACGTGGAGCTCGGATCC  | 2.60  | 21.83 |
| 34 | CGTACGGTCGACGCTAGCGGTAAATAACATCACGTGGAGCTCGGATCC  | 2.60  | 38.19 |
| 35 | CGTACGGTCGACGCTAGCATGATAGTCTTACACGTGGAGCTCGGATCC  | 2.60  | 36.82 |
| 36 | CGTACGGTCGACGCTAGCACTCATTCCGGTCACGTGGAGCTCGGATCC  | 2.60  | 45.00 |
| 37 | CGTACGGTCGACGCTAGCAGTATGGAGAAGCACGTGGAGCTCGGATCC  | 2.60  | 24.55 |
| 38 | CGTACGGTCGACGCTAGCATTTCATCCCCGGCACGTGGAGCTCGGATCC | 2.60  | 24.55 |
| 39 | CGTACGGTCGACGCTAGCTACTGTGCATTCCACGTGGAGCTCGGATCC  | 2.60  | 68.17 |
| 40 | CGTACGGTCGACGCTAGCAGCTCTCAGCCCCACGTGGAGCTCGGATCC  | 2.60  | 38.19 |
| 41 | CGTACGGTCGACGCTAGCTGTGCCTCAGAACACGTGGAGCTCGGATCC  | 2.60  | 40.91 |
| 42 | CGTACGGTCGACGCTAGCTAGAACTGTTAGCACGTGGAGCTCGGATCC  | 2.60  | 28.64 |
| 43 | CGTACGGTCGACGCTAGCTCCTCCATACGGCACGTGGAGCTCGGATCC  | 2.60  | 27.27 |
| 44 | CGTACGGTCGACGCTAGCACAGTAGACATGCACGTGGAGCTCGGATCC  | 2.60  | 25.92 |
| 45 | CGTACGGTCGACGCTAGCATAATGCTACACCACGTGGAGCTCGGATCC  | 2.60  | 51.83 |
| 46 | CGTACGGTCGACGCTAGCAATCGGTTCTCCACGTGGAGCTCGGATCC   | 2.60  | 25.92 |
| 47 | CGTACGGTCGACGCTAGCGGTTATGTTGGGCACGTGGAGCTCGGATCC  | 2.60  | 19.09 |
| 48 | CGTACGGTCGACGCTAGCGCCACGCCGCGGCACGTGGAGCTCGGATCC  | 2.60  | 23.18 |
| 49 | CGTACGGTCGACGCTAGCTGCATATACGAACACGTGGAGCTCGGATCC  | 2.60  | 66.82 |
| 50 | CGTACGGTCGACGCTAGCCCGCTGAGCCCTCACGTGGAGCTCGGATCC  | 2.60  | 28.64 |
| 51 | CGTACGGTCGACGCTAGCTTGACATTCACCACGTGGAGCTCGGATCC   | 2.60  | 47.73 |
| 52 | CGTACGGTCGACGCTAGCTATATTGCTCTCCACGTGGAGCTCGGATCC  | 2.60  | 64.09 |
| 53 | CGTACGGTCGACGCTAGCCCGTAATCGTAGCACGTGGAGCTCGGATCC  | 2.60  | 40.91 |
| 54 | CGTACGGTCGACGCTAGCTGGGTTTATCTCCACGTGGAGCTCGGATCC  | 2.60  | 31.37 |
| 55 | CGTACGGTCGACGCTAGCTGAATGTCTTAACACGTGGAGCTCGGATCC  | 2.60  | 42.28 |
| 56 | CGTACGGTCGACGCTAGCCGGATAAGTTCACACGTGGAGCTCGGATCC  | 2.60  | 27.27 |
| 57 | CGTACGGTCGACGCTAGCGATTCATCGAGGCACGTGGAGCTCGGATCC  | 2.60  | 32.73 |
| 58 | CGTACGGTCGACGCTAGCATGAATAGATCTCACGTGGAGCTCGGATCC  | 2.60  | 73.63 |
| 59 | CGTACGGTCGACGCTAGCTTATGTTATTTACACGTGGAGCTCGGATCC  | 2.60  | 47.72 |
| 60 | CGTACGGTCGACGCTAGCGACTACATTAAGCACGTGGAGCTCGGATCC  | 2.60  | 36.82 |
| 61 | CGTACGGTCGACGCTAGCTCGAATGGGAGACACGTGGAGCTCGGATCC  | 2.60  | 28.64 |
| 62 | CGTACGGTCGACGCTAGCGGTGCTGCAGTGCACGTGGAGCTCGGATCC  | 2.60  | 25.92 |
| 63 | CGTACGGTCGACGCTAGCCGTGGATTCTGCACGTGGAGCTCGGATCC   | 2.60  | 39.54 |
| 64 | CGTACGGTCGACGCTAGCATGATCTATAGGCACGTGGAGCTCGGATCC  | 2.60  | 32.73 |
| 65 | CGTACGGTCGACGCTAGCCAAAAGGCAGTCACGTGGAGCTCGGATCC   | 2.60  | 27.27 |
| 66 | CGTACGGTCGACGCTAGCATCAAACCTAGTCACGTGGAGCTCGGATCC  | 2.60  | 58.64 |
| 67 | CGTACGGTCGACGCTAGCCTTGTCATCAGCGCACGTGGAGCTCGGATCC | 2.60  | 34.10 |
| 68 | CGTACGGTCGACGCTAGCTAGGTGGAAAAGCACGTGGAGCTCGGATCC  | 2.60  | 19.09 |
| 69 | CGTACGGTCGACGCTAGCTAACGGTTTGTCCACGTGGAGCTCGGATCC  | 2.60  | 42.28 |
| 70 | CGTACGGTCGACGCTAGCAATTCTAACAAACACGTGGAGCTCGGATCC  | 2.60  | 23.18 |
| 71 | CGTACGGTCGACGCTAGCTTTACATATTCTCACGTGGAGCTCGGATCC  | 26.00 | 98.19 |
| 72 | CGTACGGTCGACGCTAGCTAACCCGTTCTCCACGTGGAGCTCGGATCC  | 2.60  | 46.37 |
| 73 | CGTACGGTCGACGCTAGCTTGGAAGTACCACACGTGGAGCTCGGATCC  | 2.60  | 70.91 |
| 74 | CGTACGGTCGACGCTAGCCTACCAACGTAACACGTGGAGCTCGGATCC  | 2.60  | 24.55 |
| 75 | CGTACGGTCGACGCTAGCTGCATTTAGAGTCACGTGGAGCTCGGATCC  | 2.60  | 35.45 |
| 76 | CGTACGGTCGACGCTAGCTGAGAACAAATCCACGTGGAGCTCGGATCC  | 2.60  | 36.82 |
| 77 | CGTACGGTCGACGCTAGCCAATCTTACAGCCACGTGGAGCTCGGATCC  | 2.60  | 45.02 |
| 78 | CGTACGGTCGACGCTAGCTTTCTCCGTTTTACGTGGAGCTCGGATCC   | 2.60  | 68.19 |
| 79 | CGTACGGTCGACGCTAGCGCGGCTTCTGGTCACGTGGAGCTCGGATCC  | 2.60  | 19.09 |
| 80 | CGTACGGTCGACGCTAGCACTGGAACCTATCACGTGGAGCTCGGATCC  | 2.60  | 19.09 |
| 81 | CGTACGGTCGACGCTAGCGGCTAGAGGGGTCACGTGGAGCTCGGATCC  | 2.60  | 10.91 |
| 82 | CGTACGGTCGACGCTAGCACGTGCGATTTCACGTGGAGCTCGGATCC   | 2.60  | 27.27 |
| 83 | CGTACGGTCGACGCTAGCACGAGCACCTCCACGTGGAGCTCGGATCC   | 2.60  | 39.54 |
| 84 | CGTACGGTCGACGCTAGCCGCCATCAACACCACGTGGAGCTCGGATCC  | 2.60  | 38.19 |
| 85 | CGTACGGTCGACGCTAGCAGTCTGAATTGGCACGTGGAGCTCGGATCC  | 2.60  | 31.36 |
| 86 | CGTACGGTCGACGCTAGCTATTGATGTTAGCACGTGGAGCTCGGATCC  | 2.60  | 42.28 |
| 87 | CGTACGGTCGACGCTAGCTCATATCGCAATCACGTGGAGCTCGGATCC  | 2.60  | 73.65 |

|     |                                                  |      |       |
|-----|--------------------------------------------------|------|-------|
| 88  | CGTACGGTCGACGCTAGCGTGGGAAACTAACACGTGGAGCTCGGATCC | 2.60 | 19.09 |
| 89  | CGTACGGTCGACGCTAGCCAGGCCTATCGGCACGTGGAGCTCGGATCC | 2.60 | 36.82 |
| 90  | CGTACGGTCGACGCTAGCCTGCTGCAAAGCCACGTGGAGCTCGGATCC | 2.60 | 27.27 |
| 91  | CGTACGGTCGACGCTAGCTCCCGATCTTAGCACGTGGAGCTCGGATCC | 2.60 | 28.64 |
| 92  | CGTACGGTCGACGCTAGCGGTGTTCTGATGCACGTGGAGCTCGGATCC | 2.60 | 34.10 |
| 93  | CGTACGGTCGACGCTAGCTATAGACACCGGCACGTGGAGCTCGGATCC | 2.60 | 42.28 |
| 94  | CGTACGGTCGACGCTAGCGTATCAGCCGCCACGTGGAGCTCGGATCC  | 2.60 | 24.55 |
| 95  | CGTACGGTCGACGCTAGCTGCACTTCCCTGCACGTGGAGCTCGGATCC | 2.60 | 36.82 |
| 96  | CGTACGGTCGACGCTAGCGTAAGTTGTACACACGTGGAGCTCGGATCC | 2.60 | 31.36 |
| 97  | CGTACGGTCGACGCTAGCAGCTGCGCGAGGCACGTGGAGCTCGGATCC | 2.60 | 23.18 |
| 98  | CGTACGGTCGACGCTAGCTGCCTCTCTCTCCACGTGGAGCTCGGATCC | 2.60 | 84.54 |
| 99  | CGTACGGTCGACGCTAGCAAGATATACAGTCACGTGGAGCTCGGATCC | 2.60 | 15.00 |
| 100 | CGTACGGTCGACGCTAGCGACTATGTACCACACGTGGAGCTCGGATCC | 2.60 | 53.18 |

## References

1. J. Zhang, K. Kobert, T. Flouri and A. Stamatakis, *Bioinformatics*, 2014, **30**, 614-620.
2. K. K. Alam, J. L. Chang and D. H. Burke, *Molecular Therapy. Nucleic Acids*, 2015, **4**, 230.

## Mass Spectra

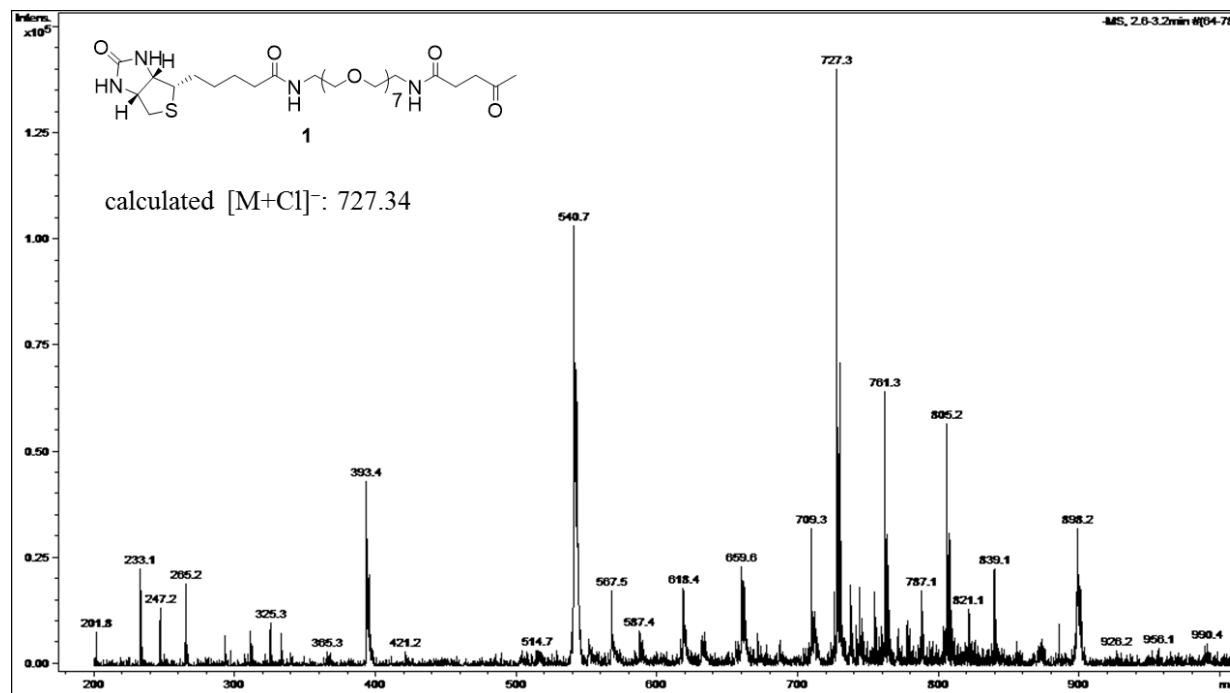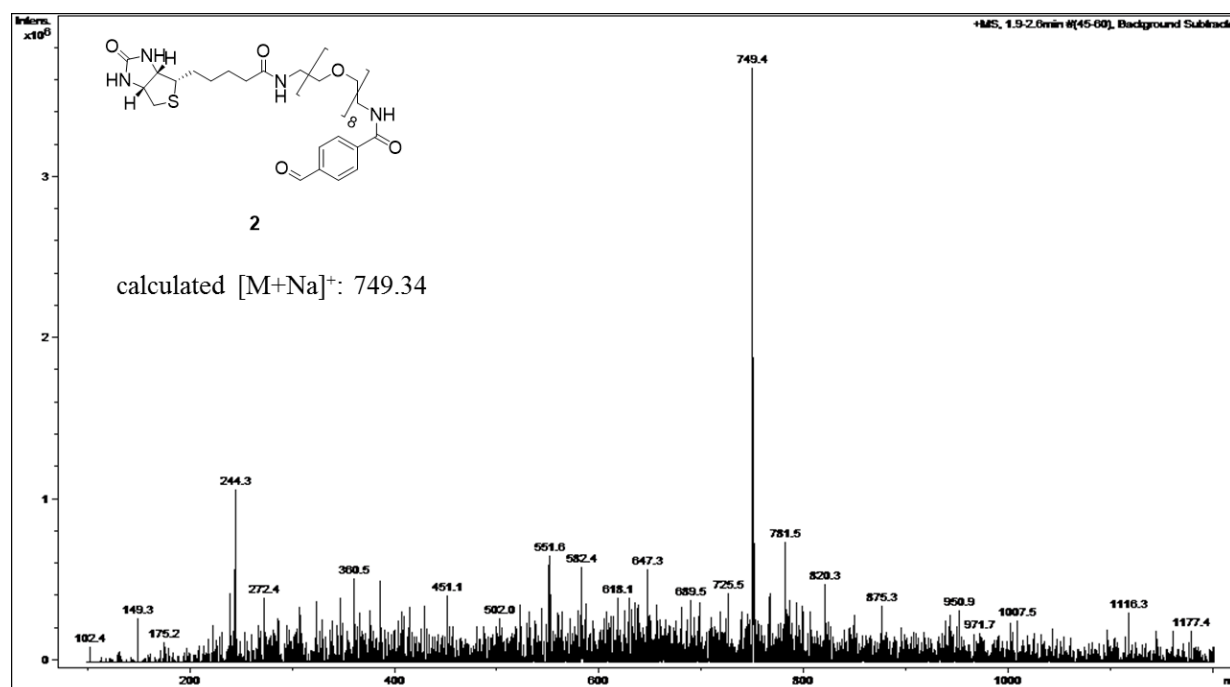

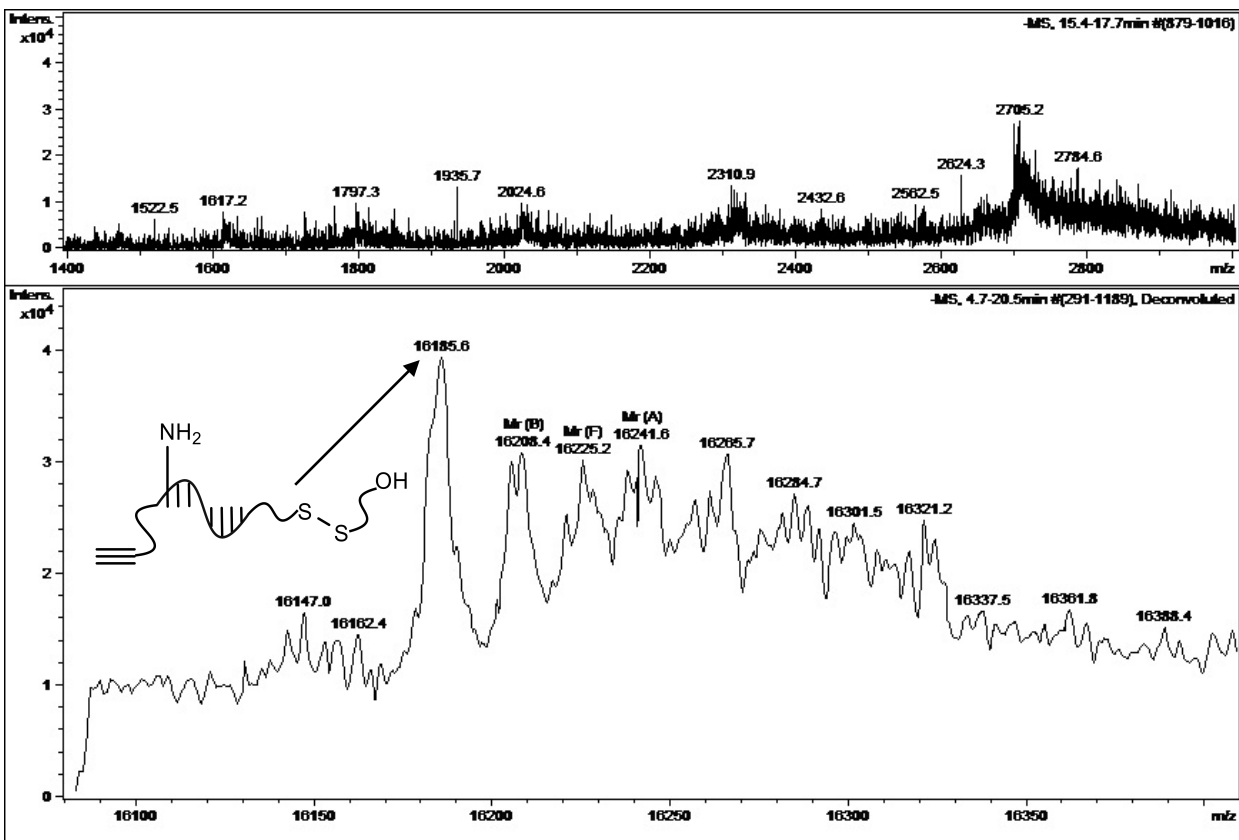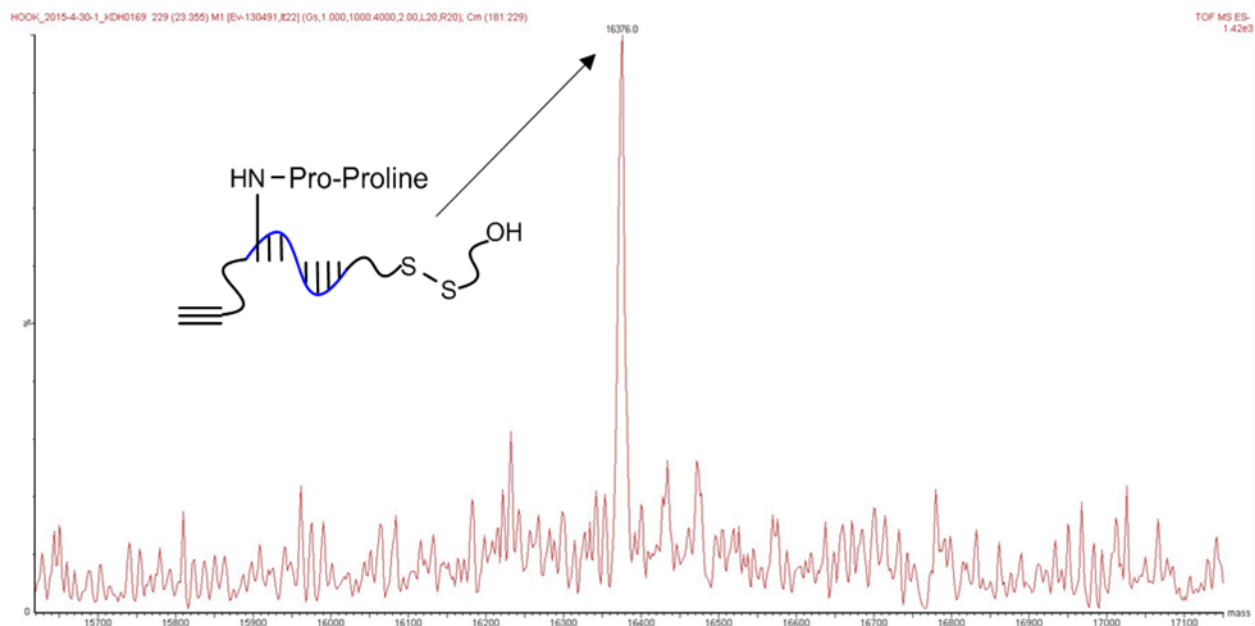

HOOK\_2015-5-6-5\_KDH0174A 119 (12.141) M1 [Ev50643,l75] (Gs,1.000,1642.4000,2.00,L20,R20); Sm (Mn, 20x3.00); Cm (118:203)

TOF MS ES-  
2.54e3

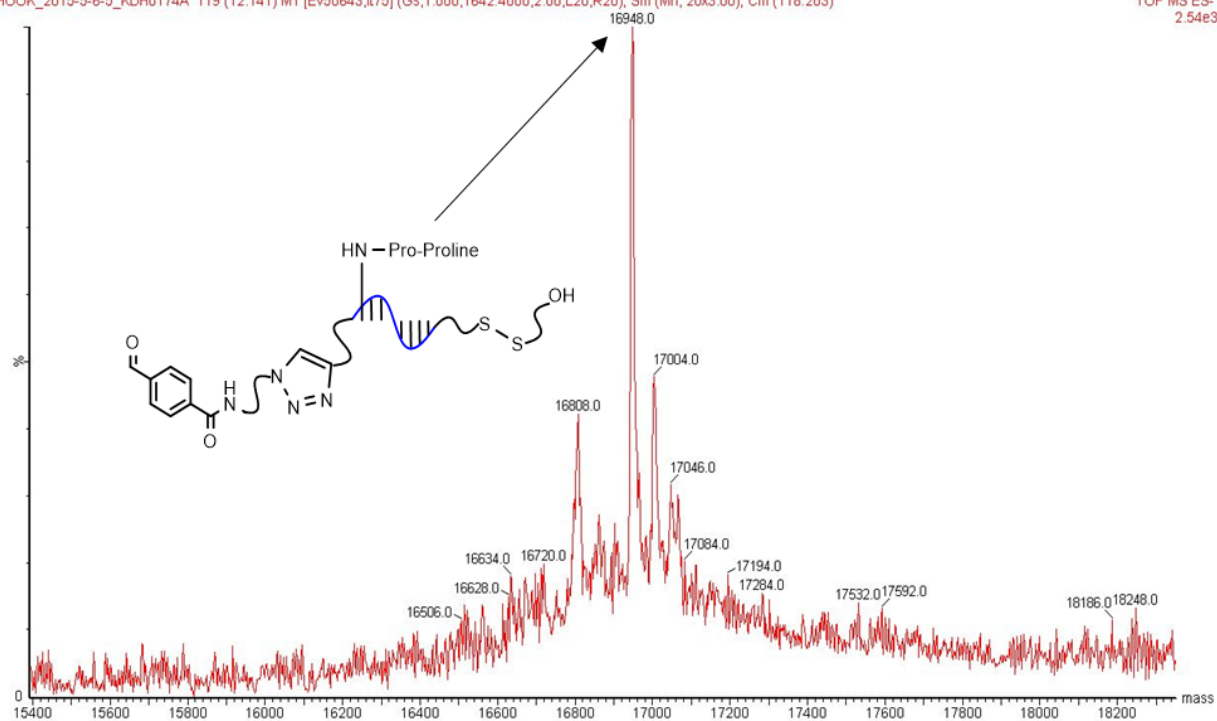

HOOK\_2015-5-6-4\_KDH0174K 221 (22.542) M1 [Ev20928,l117] (Gs,1.000,2004.3739,2.00,L20,R20); Sm (Mn, 20x3.00); Cm (142:221)

TOF MS ES-  
1.20e3

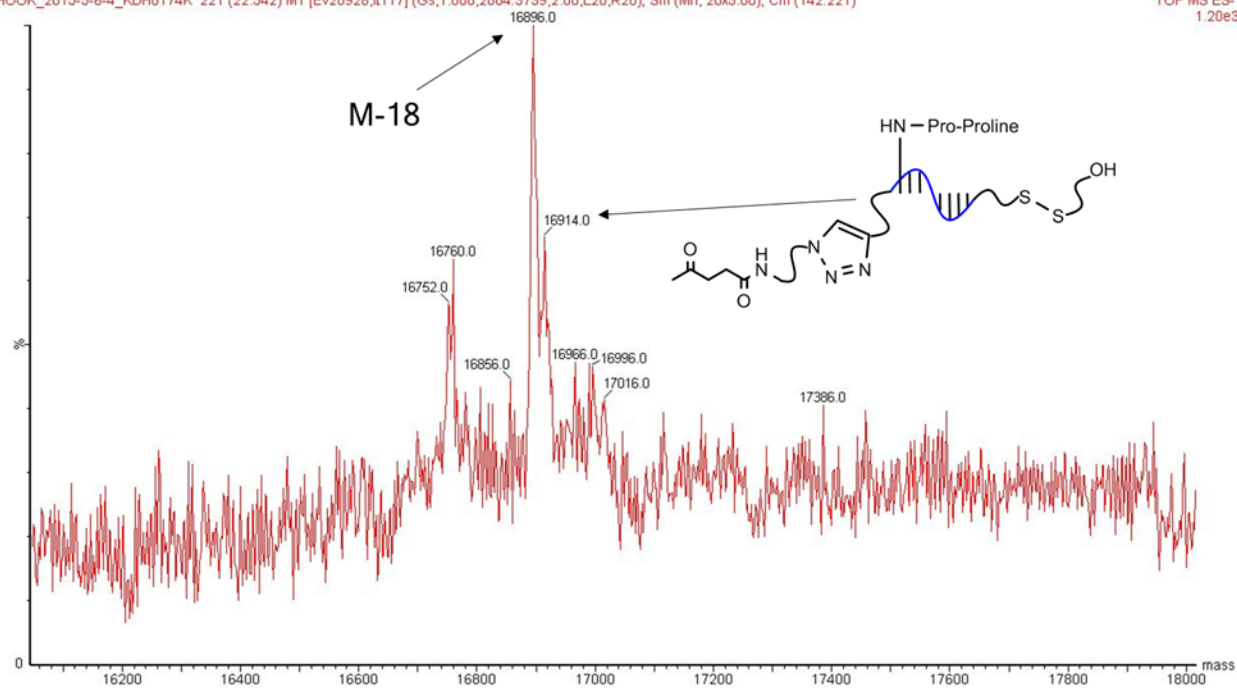

## PEGylated-oligonucleotides

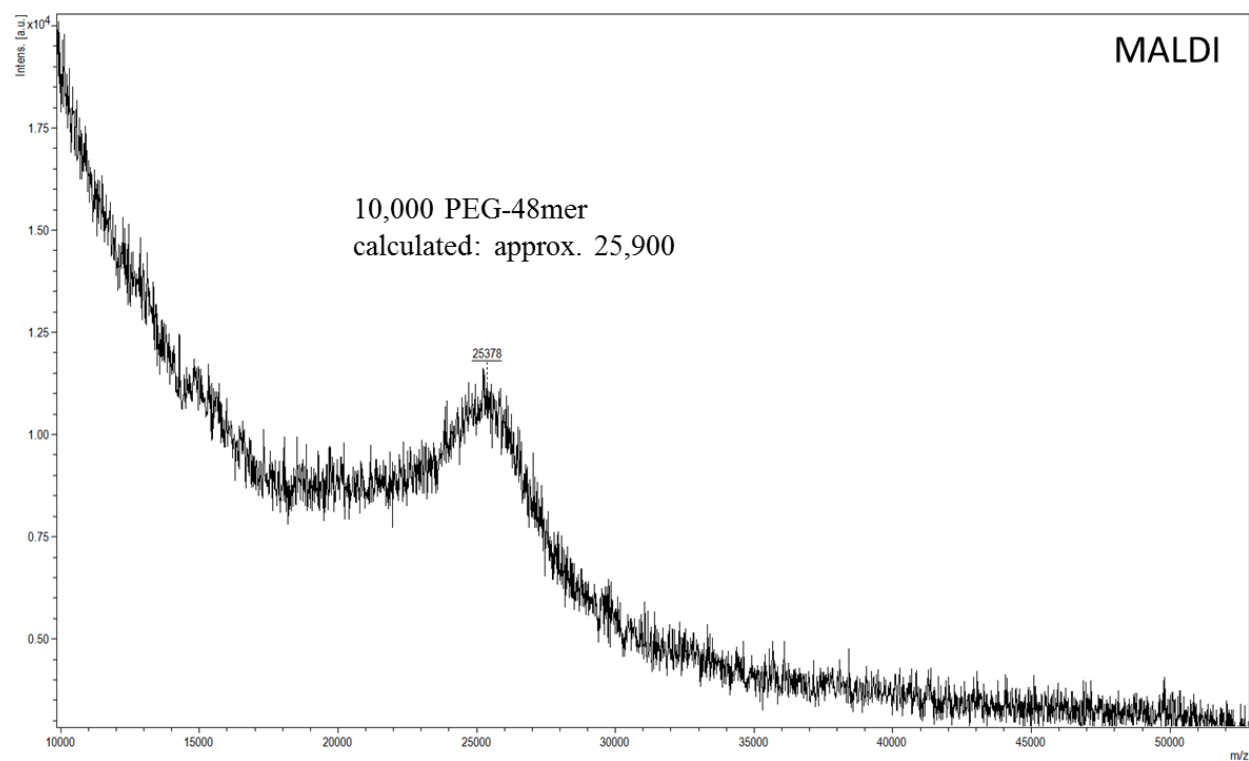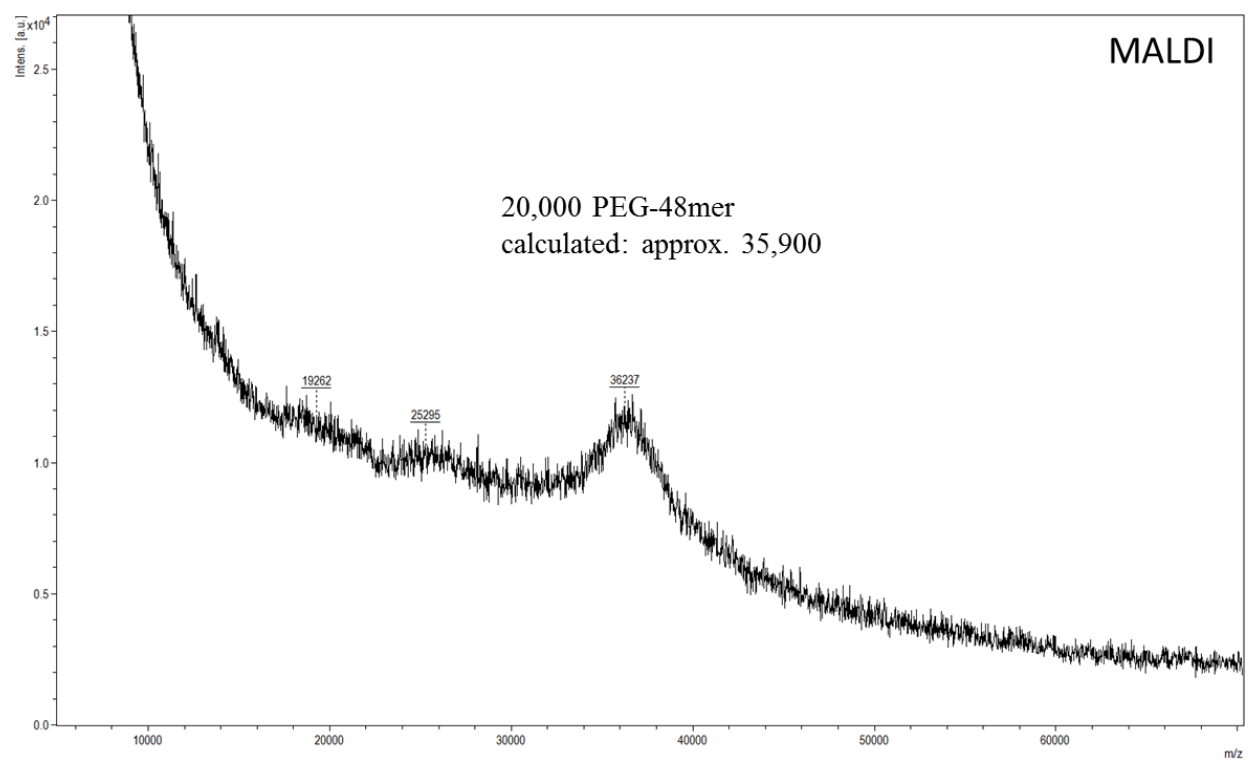

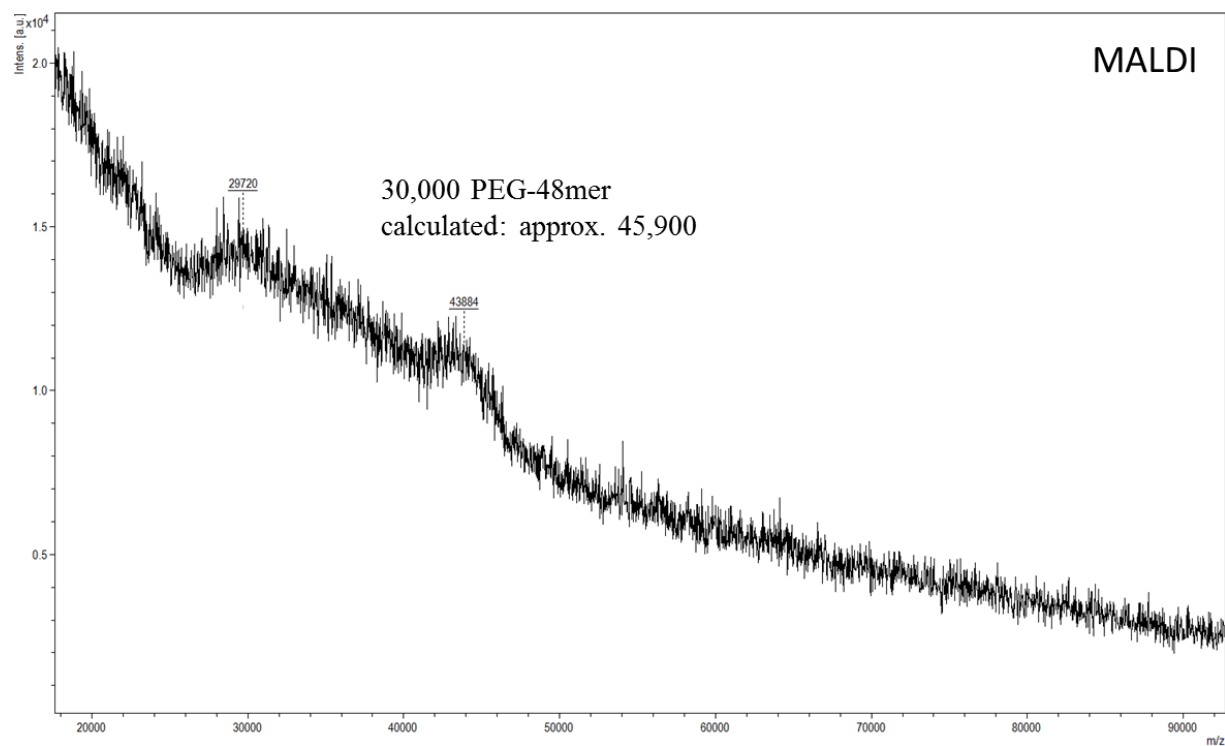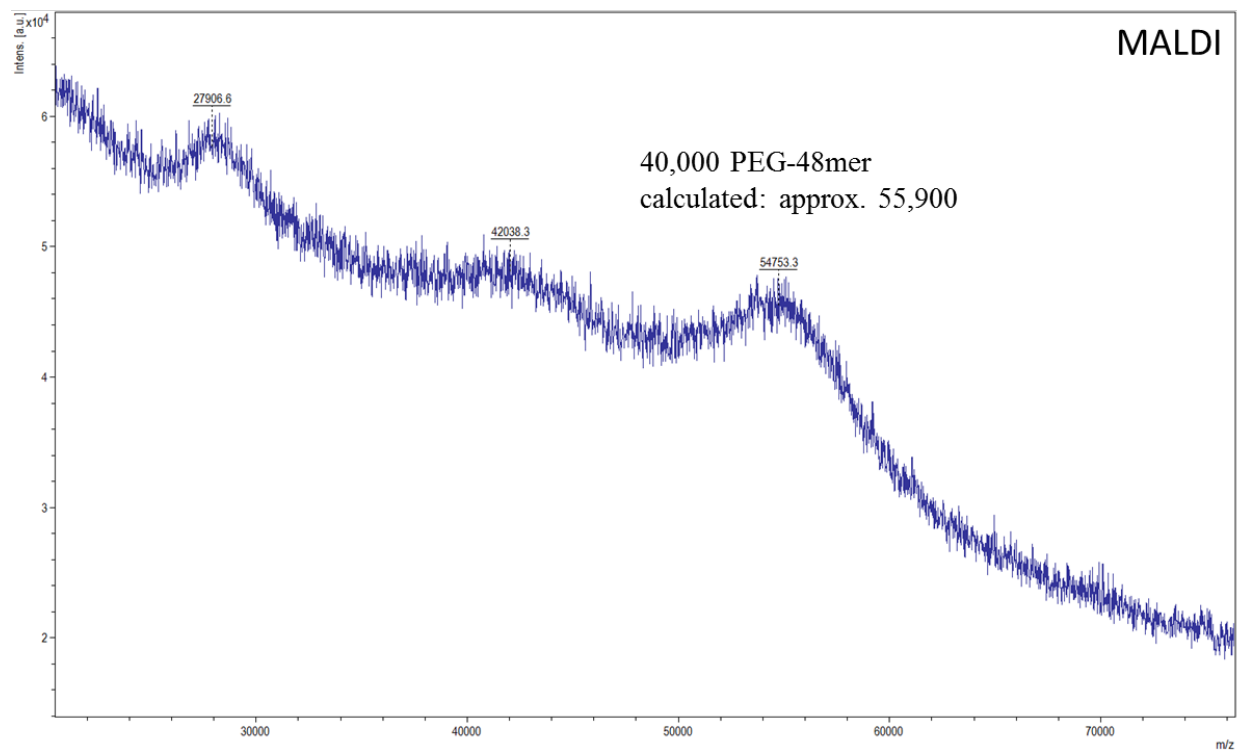

Supplement: c7sc02779f1.pdf [file c7sc02779f1.pdf]
